# Supplementary material
Source: PubMed Central journal article supplement (PMC9384491)
Supplement: MD-013-D2MD00081D-s001.pdf [file MD-013-D2MD00081D-s001.pdf]

## SUPPORTING INFORMATION

### INHIBITION OF NAV1.7: THE POSSIBILITY OF IDEAL ANALGESICS

Yutaka Kitano<sup>a</sup> and Tsuyoshi Shinozuka<sup>\*,a</sup>

<sup>a</sup>R&D Division, Daiichi Sankyo Co., Ltd., 1-2-58 Hiromachi, Shinagawa-ku, Tokyo 140-8710, Japan

Table of contents

1. Calculation of the free plasma concentration and Nav1.7 coverage in Tables 5-7
2. References

1. Calculation of the free plasma concentration and Nav1.7 coverage in Tables 5-7

#### Compound 6<sup>1</sup>

CFA model

Free plasma concentration at 1 mg/kg:  $7.8 \text{ [ng/mL]} \times 1000/314.35 = 24.8 \text{ [nM]}$

CCI model (subchronic)

Free plasma concentrations on Day 8 after administration for 0.5 h/day at 0.5 mg/kg:  $1.9 \text{ [ng/mL]} \times 1000/314.35 = 6.0 \text{ [nM]}$

Free plasma concentrations on Day 8 after administration for 0.5 h/day at 5 mg/kg:  $23.4 \text{ [ng/mL]} \times 1000/314.35 = 74.4 \text{ [nM]}$

#### Compound 9<sup>2</sup>

Rat SNL model

Free in vivo EC<sub>50</sub>:  $72 \text{ (in vivo EC}_{50} \text{ [}\mu\text{M])} \times 0.01 = 0.72 \text{ [}\mu\text{M]}$

#### Compound 10 (Mw: 436.48)<sup>3</sup>

Rat MIA model

In vivo acute EC<sub>50</sub>:  $2.5 \text{ [}\mu\text{g/mL]} = 2.5 \times 1000/436.48 = 5.7 \text{ [}\mu\text{M]}$

In vivo subchronic EC<sub>50</sub>:  $0.8 \text{ [}\mu\text{g/mL]} = 0.8 \times 1000/436.48 = 1.8 \text{ [}\mu\text{M]}$

#### Compound 13 (Mw: 391.46)<sup>4</sup>

Thermal hyperalgesia in PSNL mouse

Free plasma concentration:  $0.10 \text{ (}C_{max} \text{ [}\mu\text{g/mL])} \times 1000/391.46 \times 0.0104 = 0.0027 \text{ [}\mu\text{M]@30 mg/kg}$

Nav1.7 coverage:  $(0.0027 \times 3.3/30)/11.8 = 0.000025\text{-fold@3.3 mg/kg}$

#### Compound 14 (Mw: 434.41)<sup>5</sup>

Phase 1 rat formalin: 65%@43 mg/kg

Nav1.7 coverage@43 mg/kg:  $400 \text{ (Free plasma concentration at the end of the formalin experiment [nM])}/1600 = 0.25\text{-fold}$

#### Compound 15

Phase 2 rat formalin<sup>6</sup>

Nav1.7 coverage@3 mg/kg:  $0.5 \text{ (mean plasma concentration in the formalin experiment [}\mu\text{M])} \times 0.027/0.39 = 0.035\text{-fold}$

Nav1.7 coverage@10 mg/kg:  $1.4 \text{ (mean plasma concentration in the formalin experiment [}\mu\text{M])} \times 0.027/0.39 = 0.097\text{-fold}$

Rat CFA model<sup>7</sup>

Nav1.7 coverage@3 mg/kg:  $0.78 \text{ (terminal plasma concentration [}\mu\text{M])} \times 0.027/0.39 = 0.054\text{-fold}$

Nav1.7 coverage@10 mg/kg:  $2.48 \text{ (terminal plasma concentration [}\mu\text{M])} \times 0.027/0.39 = 0.17\text{-fold}$

#### Compound 16

Aconitine-induced nociceptive events in IEM mouse<sup>8</sup>

Nav1.7 coverage@in vivo IC<sub>50</sub>:  $24.5 \text{ (in vivo IC}_{50} \text{ [}\mu\text{M])} \times 0.013/0.0039 = 82\text{-fold}$

Odorant-induced olfaction at 9.50 mg/kg (i.v. infusion)<sup>9</sup>

Nav1.7 coverage@9.50 mg/kg:  $107 \text{ (plasma concentration [}\mu\text{M])} \times 0.001/0.926 = 0.12\text{-fold}$

#### Compound 17<sup>10</sup>

Phase 2 rat formalin

Nav1.7 coverage@100 mg/kg: 250–260 (free plasma concentration [nM])/26 = 9.6–10-fold

Acute pain evoked by aconitine in rat

Nav1.7 coverage@100 mg/kg: 250–260 (free plasma concentration [nM])/26 = 9.6–10-fold

Compound 18<sup>11</sup>

Phase 2 rat formalin: 36%@3 mg/kg

Nav1.7 coverage@3 mg/kg: 343 (unbound drug concentration [nM])/33 = 10-fold

Phase 2 rat formalin: 61%@10 mg/kg

Nav1.7 coverage@10 mg/kg: 18,000 ( $C_{max}$  at PK study [nM])  $\times$  0.071/33 = 39-fold

Compound 19<sup>12</sup>

Thermal hyperalgesia in PSNL mouse: 89%@1 mg/kg

Nav1.7 coverage@1 mg/kg: 105 ( $C_{max}$  at PK study [nM])  $\times$  0.033/59.4 = 0.058-fold

Thermal hyperalgesia in PSNL mouse: 89%@3 mg/kg

Nav1.7 coverage@3 mg/kg: 464 ( $C_{max}$  at PK study [nM])  $\times$  0.033/59.4 = 0.26-fold

Compound 20<sup>13</sup>

Mouse histamine-induced pruritus model: 81%@30 mg/kg

Nav1.7 coverage@30 mg/kg: 490 (unbound plasma concentration [nM])/30 = 16-fold

Capsaicin-induced nociception pain model: 55%@100 mg/kg

Nav1.7 coverage@100 mg/kg: 1300 (unbound plasma concentration [nM])/30 = 43-fold

Capsaicin-induced nociception pain model: 74%@300 mg/kg

Nav1.7 coverage@100 mg/kg: 1700 (unbound plasma concentration [nM])/30 = 57-fold

Compound 21<sup>14</sup>

Reduction in nociceptive events in the IEM mouse model

Nav1.7 coverage@EC<sub>50</sub>: 9.6 (unbound EC<sub>50</sub> [nM])/0.38 ( $K_d$ ) = 25-fold

Compound 22<sup>15</sup>

Phase 2 rat formalin: 17%@10 mg/kg

Nav1.7 coverage@10 mg/kg (calculated based on rNav1.7 PX IC<sub>50</sub>): 0.027 (unbound plasma concentration [ $\mu$ M])/0.067 = 0.40-fold

Phase 2 rat formalin: 39%@30 mg/kg

Nav1.7 coverage@30 mg/kg (calculated based on rNav1.7 PX IC<sub>50</sub>): 0.065 (unbound plasma concentration [ $\mu$ M])/0.067 = 0.97-fold

Phase 2 rat formalin: 70%@100 mg/kg

Nav1.7 coverage@100 mg/kg (calculated based on rNav1.7 PX IC<sub>50</sub>): 0.18 (unbound plasma concentration [ $\mu$ M])/0.067 = 2.7-fold

Compound 24

Aconitine-induced pain in IEM mouse<sup>8</sup>

Nav1.7 coverage@in vivo IC<sub>50</sub>: 0.40 (in vivo IC<sub>50</sub> [ $\mu$ M])  $\times$  0.22/0.0031 = 28-fold

Phase 2 mouse formalin@30 mg/kg<sup>16</sup>

Plasma Nav1.7 coverage@30 mg/kg: 340 (free plasma concentration [nM])/3.9 = 87-fold

DRG Nav1.7 coverage@30 mg/kg: 340 (free DRG concentration [nM])/1.8 = 189-fold

Phase 2 mouse formalin@60 mg/kg<sup>17</sup>

Plasma Nav1.7 coverage@60 mg/kg: 1270 (free plasma concentration [nM])/3.9 = 326-fold

DRG Nav1.7 coverage@60 mg/kg: 340 (DRG concentration [nM])  $\times$  0.24/3.9 = 21-fold (the plasma protein binding as an estimate of tissue binding)

Compound 25<sup>18</sup>

Mouse histamine-induced pruritus model

Nav1.7 coverage@60 mg/kg: 5100 (unbound plasma concentration [nM])/180 = 28-fold

### Compound 29<sup>9</sup>

Odorant-induced olfaction at 12.06 and 24.12 mg/kg

Nav1.7 coverage@1.34 mg/kg (i.v. infusion):  $2.0$  (plasma concentration [ $\mu\text{M}$ ])  $\times 0.0737/0.295 = 0.50$ -fold

Nav1.7 coverage@2.68 mg/kg (i.v. infusion):  $13.8$  (plasma concentration [ $\mu\text{M}$ ])  $\times 0.0737/0.295 = 3.4$ -fold

Nav1.7 coverage@4.02 mg/kg (i.v. infusion):  $23$  (plasma concentration [ $\mu\text{M}$ ])  $\times 0.0737/0.295 = 5.7$ -fold

Nav1.7 coverage@12.06 mg/kg (i.v. infusion):  $48.4$  (plasma concentration [ $\mu\text{M}$ ])  $\times 0.0737/0.295 = 12$ -fold

Nav1.7 coverage@24.12 mg/kg (i.v. infusion):  $169$  (plasma concentration [ $\mu\text{M}$ ])  $\times 0.0737/0.295 = 42$ -fold

Withdrawal responses to noxious heat in rhesus monkeys

Nav1.7 coverage@20 mg/kg (s.c.):  $7.74$  (plasma concentration [ $\mu\text{M}$ ])  $\times 0.0737/0.295 = 1.9$ -fold

### Compound 31<sup>17</sup>

Phase 2 mouse formalin

Nav1.7 coverage@100 mg/kg:  $0.32$  (free plasma concentration [ $\mu\text{M}$ ])/ $0.0075 = 43$ -fold

DRG Nav1.7 coverage in DRG@100 mg/kg:  $72$  (DRG concentration [ $\text{nM}$ ])  $\times 0.08/7.5 = 0.77$ -fold (the plasma protein binding as an estimate of tissue binding)

### Compound 32<sup>19</sup>

Mouse CCI-induced cold hyperalgesia model

Nav1.7 coverage@100 mg/kg:  $0.74$  (free plasma concentration [ $\mu\text{M}$ ])/ $0.054 = 14$ -fold

Mouse CFA thermal hyperalgesia model

Nav1.7 coverage@30 mg/kg:  $26$  (free plasma concentration [ $\text{nM}$ ])/ $54 = 0.5$ -fold

Nav1.7 coverage@60 mg/kg:  $59$  (free plasma concentration [ $\text{nM}$ ])/ $54 = 1$ -fold

Phase 2 mouse formalin

Nav1.7 coverage@30 mg/kg:  $0.17$  (free plasma concentration@60 min [ $\mu\text{M}$ ])/ $0.054 = 3$ -fold

Nav1.7 coverage@30 mg/kg in DRG:  $0.07$  (free DRG concentration@60 min [ $\mu\text{M}$ ])/ $0.054 = 1$ -fold

### Compound 36<sup>8</sup>

Aconitine-induced nociceptive events in IEM mouse

Nav1.7 coverage@in vivo IC<sub>50</sub>:  $7.3$  (in vivo IC<sub>50</sub> [ $\mu\text{M}$ ])  $\times 0.007/0.0151 = 3.4$ -fold

### Compound 37<sup>8</sup>

Aconitine-induced nociceptive events in IEM mouse

Nav1.7 coverage@in vivo IC<sub>50</sub>:  $0.97$  (in vivo IC<sub>50</sub> [ $\mu\text{M}$ ])  $\times 0.002/0.0032 = 0.61$ -fold

### Compound 38<sup>20</sup>

Aconitine-induced nociceptive events in IEM mouse

Nav1.7 coverage@in vivo EC<sub>50</sub>:  $0.42$  (free in vivo EC<sub>50</sub> [ $\text{nM}$ ])/ $0.4 = 1.1$ -fold

### Compound 39<sup>21</sup>

Mouse histamine-induced scratching

Nav1.7 coverage@300 mg/kg:  $4.15$  (free plasma concentration [ $\mu\text{M}$ ])/ $0.27$  (native TTX-S currents inhibition in the mouse DRG) =  $15$ -fold

Nav1.7 coverage@300 mg/kg:  $4.15$  (free plasma concentration [ $\mu\text{M}$ ])/ $0.115$  (mouse Nav1.7) =  $36$ -fold

### Compound 40<sup>16</sup>

Phase 2 mouse formalin

Plasma Nav1.7 coverage@30 mg/kg i.p.:  $59,000$  (plasma concentration [ $\text{nM}$ ])  $\times 0.002/35 = 3.4$ -fold

DRG Nav1.7 coverage@30 mg/kg i.p.:  $2724$  (plasma concentration [ $\text{nM}$ ])  $\times 0.035/11 = 8.7$ -fold

Mouse CFA model

Plasma Nav1.7 coverage@30 mg/kg i.p.:  $63,000$  (plasma concentration [ $\text{nM}$ ])  $\times 0.002/35 = 3.6$ -fold

Mouse CCI model

Plasma Nav1.7 coverage@30 mg/kg i.p.:  $68,000$  (plasma concentration [ $\text{nM}$ ])  $\times 0.002/35 = 3.9$ -fold

## Compound 41<sup>22</sup>

Aconitine-induced pain in IEM mouse

Plasma Nav1.7 coverage@0.3 mg/kg: 3100 (plasma concentration [nM]) × 0.001/0.6 = 5-fold

Plasma Nav1.7 coverage@3 mg/kg: 25,000 (plasma concentration [nM]) × 0.001/0.6 = 42-fold

Plasma Nav1.7 coverage@10 mg/kg: 79,000 (plasma concentration [nM]) × 0.001/0.6 = 132-fold

Phase 2 mouse formalin test

Plasma Nav1.7 coverage@10 mg/kg i.p.: 50,000 (plasma concentration [nM]) × 0.001/2.2 = 23-fold

## Compound 42<sup>23</sup>

Aconitine-induced pain in IEM mouse

Plasma Nav1.7 coverage@30 mg/kg: 2800 (plasma concentration [nM]) × 0.001/3 = 0.93-fold

Plasma Nav1.7 coverage@EC<sub>50</sub>: 500 (plasma concentration [nM]) × 0.001/3 = 0.17-fold

Plasma Nav1.7 coverage@10 mg/kg: 79,000 (plasma concentration [nM]) × 0.001/0.6 = 132-fold

## 2. References

- (1) D. R. Witty, G. Alvaro, D. Derjean, G. M. P. Giblin, K. Gunn, C. Large, D. T. Macpherson, V. Morisset, D. Owen, J. Palmer, F. Rugiero, S. Tate, C. A. Hinckley and H. Naik, *ACS Med. Chem. Lett.*, 2020, **11**, 1678.
- (2) S.-W. Yang, G. D. Ho, D. Tulshian, A. Bercovici, Z. Tan, J. Hanisak, S. Brumfield, J. Matasi, X. Sun, S. A. Sakwa, R. J. Herr, X. Zhou, T. Bridal, M. Urban, J. Vivian, D. Rindgen and S. Sorota, *Bioorg. Med. Chem. Lett.*, 2014, **24**, 4958.
- (3) J. M. Frost, D. A. DeGoey, L. Shi, R. J. Gum, M. M. Fricano, G. L. Lundgaard, O. F. El-Kouhen, G. C. Hsieh, T. Neelands, M. A. Matulenko, J. F. Daanen, M. Pai, N. Ghoreishi-Haack, C. Zhan, X.-F. Zhang and M. E. Kort, *J. Med. Chem.*, 2016, **59**, 3373.
- (4) K. Tanaka, S. Suzuki, H. Kobayashi, S. Shibuya, S. Naito, H. Kimoto, Y. Domon, K. Kubota, Y. Kitano, T. Yokoyama, A. Shimizugawa, R. Koishi, D. Asano, K. Takasuna and T. Shinozuka, *Chem. Pharm. Bull.*, 2020, **68**, 653.
- (5) I. Macsari, Y. Besidski, G. Csajernyik, L. I. Nilsson, L. Sandberg, U. Yngve, K. Åhlin, T. Bueters, A. B. Eriksson, P.-E. Lund, E. Venyike, S. Oerther, K. H. Blakeman, L. Luo and P. I. Arvidsson, *J. Med. Chem.*, 2012, **55**, 6866.
- (6) H. Bregman, L. Berry, J. L. Buchanan, A. Chen, B. Bingfan Du, E. Feric, M. Hierl, L. Huang, D. Immke, B. Janosky, D. Johnson, X. Li, J. Ligutti, D. Liu, A. Malmberg, D. Matson, J. McDermott, P. Miu, H. N. Nguyen, V. F. Patel, D. Waldon, B. Wilenkin, X. Zheng, A. Zou, S. I. McDonough and E. F. DiMauro, *J. Med. Chem.*, 2011, **54**, 4427.
- (7) D. J. Matson, D. T. Hamamoto, H. Bregman, M. Cooke, D. F. DiMauro, L. Huang, D. Johnson, X. Li, J. McDermott, C. Morgan, B. Wilenkin, A. B. Malmberg, S. I. McDonough and D. A. Simone, *PLoS One*, 2015, **10**, e0138140.
- (8) G. Bankar, S. J. Goodchild, S. Howard, K. Nelkenbrecher, M. Waldbrook, M. Dourado, N. G. Shuart, S. Lin, C. Young, Z. Xie, K. Khakh, E. Chang, L. E. Sojo, A. Lindgren, S. Chowdhury, S. Decker, M. Grimwood, J. Andrez, C. M. Dehnhardt, J. Pang, J. H. Chang, B. S. Safina, D. P. Sutherland, J. P. Johnson, Jr., D. H. Hackos, C. L. Robinette and C. J. Cohen, *Cell Rep.*, 2018, **24**, 3133.
- (9) R. L. Kraus, F. Zhao, P. S. Pall, D. Zhou, J. D. Vardigan, A. Danziger, Y. Li, C. Daley, J. E. Ballard, M. K. Clements, R. M. Klein, M. A. Holahan, T. J. Greshock, R. M. Kim, M. E. Layton, C. S. Burgey, J. Serra, D. A. Henze and A. K. Houghton, *Sci. Transl. Med.*, 2021, **13**, 1050.
- (10) T. Focken, S. Liu, N. Chahal, M. Dauphinais, M. E. Grimwood, S. Chowdhury, I. Hemeon, P. Bichler, D. Bogucki, M. Waldbrook, G. Bankar, L. E. Sojo, C. Young, S. Lin, N. Shuart, R. Kwan, J. Pang, J. H. Chang, B. S. Safina, D. P. Sutherland, J. P. Johnson, Jr., C. M. Dehnhardt, T. S. Mansour, R. M. Oballa, C. J. Cohen and C. L. Robinette, *ACS Med. Chem. Lett.*, 2016, **7**, 277.
- (11) V. Ramdas, R. Talwar, V. Kanoje, R. M. Loria, M. Banerjee, P. Patil, A. A. Joshi, L. Datrang, A. K. Das, D. S. Walke, V. Kalhapure, T. Khan, G. Gote, U. Dhayagude, S. Deshpande, J. Shaikh, G. Chaure, R. R. Pal, S. Parkale, S. Suravase, S. Bhoskar, R. V. Gupta, A. Kalia, R. Yeshodharan, M. Azhar, J. Daler, V. Mali, G. Sharma, A. Kishore, R. Vyawahare, G. Agarwal, H. Pareek, S. Budhe, A. Nayak, D. Warude, P. K. Gupta, P. Joshi, S. Joshi, S. Darekar, D. Pandey, A. Wagh, P. B. Nigade, M. Mehta, V. Patil, D. Modi, S. Pawar, M. Verma, M. Singh, S. Das, J. Gundu, K. Nemmani, M. G. Bock, S. Sharma, D. Bakhle, R. K. Kamboj and V. P. Palle, *J. Med. Chem.*, 2020, **63**, 6107.
- (12) T. Shinozuka, H. Kobayashi, S. Suzuki, K. Tanaka, N. Karanjule, N. Hayashi, T. Tsuda, E. Tokumaru, M. Inoue, K. Ueda, H. Kimoto, Y. Domon, S. Takahashi, K. Kubota, T. Yokoyama, A. Shimizugawa, R. Koishi, D. Asano, T. Sakakura, K. Takasuna, Y. Abe, T. Watanabe and Y. Kitano, *J. Med. Chem.*, 2020, **63**, 10204.
- (13) R. F. Graceffa, A. A. Boezio, J. Able, S. Altmann, L. M. Berry, C. Boezio, J. R. Butler, M. Chu-Moyer, M. Cooke, E. F. DiMauro, T. A. Dineen, F. Feric Bojic, R. S. Foti, R. T. Fremeau, Jr., A. Guzman-Perez, H. Gao, H. Gunaydin, H. Huang, L. Huang, C. Ilch, M. Jarosh, T. Kornecook, C. R. Kreiman, D. S. La, J. Ligutti, B. C. Milgram, M.-H. J. Lin, I. E. Marx, H. N. Nguyen, E. A. Peterson, G. Rescourio, J. Roberts, L. Schenkel, R. Shimanovich, B. A. Sparling, J. Stellwagen, K. Taborn, K. R. Vaida, J. Wang, J. Yeoman, V. Yu, D. Zhu, B. D. Moyer and M. M. Weiss, *J. Med. Chem.* 2017, **60**, 5990.
- (14) S. J. McKerrall, T. Nguyen, K. W. Lai, P. Bergeron, L. Deng, A. DiPasquale, J. H. Chang, J. Chen, T. Chernov-Rogan, D. H. Hackos, J. Maher, D. F. Ortwine, J. Pang, J. Payandeh, W. R. Proctor, S. D. Shields, J. Vogt, P. Ji, W. Liu, E. Ballini, L. Schumann, G. Tarozzo, G. Bankar, S. Chowdhury, A. Hasan, J. P. Johnson, Jr., K. Khakh, S. Lin, C. J. Cohen, C. M. Dehnhardt, B. S. Safina and D. P. Sutherland, *J. Med. Chem.*, 2019, **62**, 4091.

- (15) D. S. La, E. A. Peterson, C. Bode, A. A. Boezio, H. Bregman, M. Y. Chu-Moyer, J. Coats, E. F. DiMauro, T. A. Dineen, B. Du, H. Gao, R. Graceffa, H. Gunaydin, A. Guzman-Perez, R. Fremeau, Jr., X. Huang, C. Ilch, T. J. Kornecook, C. Kreiman, J. Ligutti, M. H. Jasmine Lin, J. S. McDermott, I. Marx, D. J. Matson, S. I. McDonough, B. D. Moyer, H. N. Nguyen, K. Taborn, V. Yu and M. M. Weiss, *Bioorg. Med. Chem. Lett.*, 2017, **27**, 3477.
- (16) G. Luo, L. Chen, A. Easton, A. Newton, C. Bourin, E. Shields, K. Mosure, M. G. Soars, R. J. Knox, M. Matchett, R. L. Pieschl, D. Post-Munson, S. Wang, J. Herrington, J. Graef, K. Newberry, D. V. Sivarao, A. Senapati, L. Bristow, N. A. Meanwell, L. A. Thompson and C. D. Dzierba, *J. Med. Chem.*, 2019, **62**, 831.
- (17) Y.-J. Wu, J. Guernon, J. Shi, J. Ditta, K. J. Robbins, R. Rajamani, A. Easton, A. Newton, C. Bourin, K. Mosure, M. G. Soars, R. J. Knox, M. Matchett, R. L. Pieschl, D. J. Post-Munson, S. Wang, J. Herrington, J. Graef, K. Newberry, L. J. Bristow, N. A. Meanwell, R. Olson, L. A. Thompson and C. Dzierba, *J. Med. Chem.*, 2017, **60**, 2513.
- (18) T. J. Kornecook, R. Yin, S. Altmann, X. Be, V. Berry, C. P. Ilch, M. Jarosh, D. Johnson, J. H. Lee, S. G. Lehto, J. Ligutti, D. Liu, J. Luther, D. Matson, D. Ortuno, J. Roberts, K. Taborn, J. Wang, M. M. Weiss, V. Yu, D. X. D. Zhu, R. T. Fremeau, Jr. and B. D. Moyer, *J. Pharmacol. Exp. Ther.*, 2017, **362**, 146.
- (19) Y.-J. Wua, J. Guernon, A. McClure, G. Luo, R. Rajamani, A. Ng, A. Easton, A. Newton, C. Bourin, D. Parker, K. Mosure, O. Barnaby, M. G. Soars, R. J. Knox, M. Matchett, R. Pieschl, J. Herrington, P. Chen, D.V. Sivarao, L. J. Bristow, N. A. Meanwell, J. Bronson, R. Olson, L. A. Thompson and C. Dzierba, *Bioorg. Med. Chem.*, 2017, **25**, 5490.
- (20) B. S. Safina, S. J. McKerrall, S. Sun, C-A. Chen, S. Chowdhury, Q. Jia, J. Li, A. Y. Zenova, J-C. Andrez, G. Bankar, P. Bergeron, J. H. Chang, E. Chang, J. Chen, R. Dean, S. M. Decker, A. DiPasquale, T. Focken, I. Hemeon, K. Khakh, A. Kim, R. Kwan, A. Lindgren, S. Lin, J. Maher, J. Mezeyova, D. Misner, K. Nelkenbrecher, J. Pang, R. Reese, S. D. Shields, L. Sojo, T. Sheng, H. Verschoof, M. Waldbrook, M. S. Wilson, Z. Xie, C. Young, T. S. Zabka, D. H. Hackos, D. F. Ortwine, A. D. White, J.P. Johnson, Jr., C. L. Robinette, C. M. Dehnhardt, C. J. Cohen and D. P. Sutherlin, *J. Med. Chem.*, 2021, **64**, 2953.
- (21) E. F. DiMauro, S. Altmann, L. M. Berry, H. Bregman, N. Chakka, M. Chu-Moyer, E. F. Bojic, R. S. Foti, R. Fremeau, H. Gao, H. Gunaydin, A. Guzman-Perez, B. E. Hall, H. Huang, M. Jarosh, T. Kornecook, J. Lee, J. Ligutti, D. Liu, B. D. Moyer, D. Ortuno, P. E. Rose, L. B. Schenkel, K. Taborn, J. Wang, Y. Wang, V. Yu and M. M. Weiss, *J. Med. Chem.*, 2016, **59**, 7818.
- (22) S. Sun, Q. Jia, A. Y. Zenova, M. S. Wilson, S. Chowdhury, T. Focken, J. Li, S. Decker, M. E. Grimwood, J.-C. Andrez, I. Hemeon, T. Sheng, C.-A. Chen, A. White, D. H. Hackos, L. Deng, G. Bankar, K. Khakh, E. Chang, R. Kwan, S. Lin, K. Nelkenbrecher, B. D. Sellers, A. G. DiPasquale, J. Chang, J. Pang, L. Sojo, A. Lindgren, M. Waldbrook, Z. Xie, C. Young, J. P. Johnson, C. L. Robinette, C. J. Cohen, B. S. Safina, D. P. Sutherlin, D. F. Ortwine and C. M. Dehnhardt, *J. Med. Chem.*, 2019, **62**, 908.
- (23) T. Focken, S. Chowdhury, A. Zenova, M. E. Grimwood, C. Chabot, T. Sheng, I. Hemeon, S. M. Decker, M. Wilson, P. Bichler, Q. Jia, S. Sun, C. Young, S. Lin, S. J. Goodchild, N. G. Shuart, E. Chang, Z. Xie, B. Li, K. Khakh, G. Bankar, M. Waldbrook, R. Kwan, K. Nelkenbrecher, P. Karimi Tari, N. Chahal, L. Sojo, C. L. Robinette, A. D. White, C.-A. Chen, Y. Zhang, J. Pang, J. H. Chang, D. H. Hackos, J. P. Johnson, C. J. Cohen, D. F. Ortwine, D. P. Sutherlin, C. M. Dehnhardt and B. S. Safina, *J. Med. Chem.*, 2018, **61**, 4810.
